# Supplementary material
Source: PubMed Central journal article supplement (PMC9559652)
Supplement: JSLHR-65-1939-s001.pdf [file JSLHR-65-1939-s001.pdf]

**Supplemental Material S1.** Cronbach’s alpha comparing 1, 3, 7, and 10-minute samples to 20-minute samples by group (TL = typical language; DLD = developmental language disorder).

| Measure                              | Group | 1-min      | 3-min      | 7-min      | 10-min     |
|--------------------------------------|-------|------------|------------|------------|------------|
| Number of total utterances (NTU)     | TL    | <b>.95</b> | <b>.95</b> | <b>.97</b> | <b>.97</b> |
|                                      | DLD   | .80        | .80        | <b>.95</b> | <b>.97</b> |
| Words per minute (WPM)               | TL    | .77        | .77        | <b>.96</b> | <b>.96</b> |
|                                      | DLD   | .71        | .71        | <b>.94</b> | <b>.97</b> |
| Number of different words (NDW)      | TL    | .71        | .71        | <b>.95</b> | <b>.96</b> |
|                                      | DLD   | .80        | .80        | <b>.97</b> | <b>.98</b> |
| MLU                                  | TL    | -.55       | -.55       | <b>.93</b> | <b>.96</b> |
|                                      | DLD   | .52        | .52        | <b>.91</b> | <b>.96</b> |
| Percent maze words (PMW)             | TL    | .47        | .47        | .85        | .87        |
|                                      | DLD   | .56        | .56        | .77        | .74        |
| Errors and omissions (EAO)           | TL    | .60        | .60        | .61        | .73        |
|                                      | DLD   | .73        | .73        | <b>.92</b> | <b>.95</b> |
| Percent grammatical utterances (PGU) | TL    | .60        | .60        | .67        | .80        |
|                                      | DLD   | .36        | .36        | <b>.90</b> | <b>.94</b> |
| Subordinating Index (SI)             | TL    | .41        | .41        | .73        | <b>.91</b> |
|                                      | DLD   | .14        | .14        | .87        | <b>.95</b> |

Bold type indicates  $\alpha \geq .90$
