# Supplementary material
Source: PubMed Central journal article supplement (PMC9559652)
Supplement: JSLHR-65-1939-s002.pdf [file JSLHR-65-1939-s002.pdf]

**Supplemental Material S2.** Pearson correlations between 1, 3, 7, and 10-minute samples and 20-minute samples by group (TL = typical language; DLD = developmental language disorder).

| Measure                          | Group | 1-min  | 3-min         | 7-min         | 10-min        |
|----------------------------------|-------|--------|---------------|---------------|---------------|
| Number of total utterances (NTU) | TL    | .78*** | <b>.91***</b> | <b>.94***</b> | <b>.94***</b> |
|                                  | DLD   | .66**  | .84***        | <b>.91***</b> | <b>.95***</b> |
| Words per minute (WPM)           | TL    | .65**  | .82***        | <b>.93***</b> | <b>.93***</b> |
|                                  | DLD   | .59**  | .83***        | <b>.90***</b> | <b>.95***</b> |
| Number of different words (NDW)  | TL    | .56**  | .79***        | <b>.91***</b> | <b>.93***</b> |
|                                  | DLD   | .66**  | <b>.90***</b> | <b>.94***</b> | <b>.97***</b> |
| MLU                              | TL    | -.22   | .47*          | .87***        | .92***        |
|                                  | DLD   | .38    | .60**         | .83***        | .92***        |
| % maze words                     | TL    | .35    | .11           | .74***        | .77***        |
|                                  | DLD   | .64**  | .41           | .67**         | .60**         |
| Errors and omissions (EAO)       | TL    | .43    | .28           | .44*          | .58**         |
|                                  | DLD   | .58**  | .84***        | .86***        | <b>.91***</b> |
| % grammatical utterances (PGU)   | TL    | .49*   | .30           | .51*          | .68**         |
|                                  | DLD   | .37    | .59**         | .82***        | .88***        |
| Subordinating Index (SI)         | TL    | .40    | .17           | .57**         | .84***        |
|                                  | DLD   | .18    | .39           | .78***        | <b>.92***</b> |

\* $p < .05$ . \*\* $p < .01$ . \*\*\* $p < .001$ . Bold type indicates  $r \geq .90$ .
