# Supplementary material
Source: PubMed Central journal article supplement (PMC9559652)
Supplement: JSLHR-65-1939-s003.pdf [file JSLHR-65-1939-s003.pdf]

**Supplemental Material S3.** Coefficient of Variation (CV) for 1, 3, 7, 10, and 20-minute samples by group (TL = typical language; DLD = developmental language disorder).

| Measure                              | Group | 1-min | 3-min | 7-min | 10-min | 20-min |
|--------------------------------------|-------|-------|-------|-------|--------|--------|
| Number of total utterances (NTU)     | TL    | .40   | .34   | .35   | .33    | .32    |
|                                      | DLD   | .52   | .47   | .40   | .36    | .31    |
| Words per minute (WPM)               | TL    | .47   | .42   | .40   | .39    | .37    |
|                                      | DLD   | .75   | .65   | .60   | .54    | .48    |
| Number of different words (NDW)      | TL    | .36   | .29   | .24   | .23    | .20    |
|                                      | DLD   | .59   | .50   | .41   | .34    | .29    |
| MLU                                  | TL    | .25   | .18   | .17   | .17    | .18    |
|                                      | DLD   | .29   | .31   | .23   | .21    | .21    |
| Percent maze words (PMW)             | TL    | 1.60  | .87   | .55   | .49    | .51    |
|                                      | DLD   | 1.71  | 1.39  | .77   | .50    | .56    |
| Errors and omissions (EAO)           | TL    | 1.74  | .98   | .65   | .62    | .43    |
|                                      | DLD   | 1.35  | .83   | .69   | .66    | .65    |
| Percent grammatical utterances (PGU) | TL    | .05   | .05   | .03   | .02    | .03    |
|                                      | DLD   | .29   | .14   | .09   | .09    | .09    |
| Subordinating Index (SI)             | TL    | .14   | .10   | .05   | .05    | .05    |
|                                      | DLD   | .26   | .20   | .12   | .11    | .09    |

Coefficients of variation (CV) expressed as ratios.
