# Supplementary material
Source: PubMed Central journal article supplement (PMC9559652)

**Supplemental Material S4.** Bland-Altman plots for eight LSA measures comparing 1, 3, 7, and 10-min sample lengths to 20-min sample length by group (TL = typical language; DLD = developmental language disorder). These figures show differences in scores between sample lengths on the y-axis and scores from 20-min samples on the x-axis. Solid black horizontal line = mean difference between sample measures, dashed horizontal lines = limits of agreement (LOA) based on  $\pm 1.96$  SDs of mean differences, shaded horizontal bars = 95% confidence intervals for LOA. The distance between the horizontal mean difference line and zero shows measurement bias. Plots with  $\geq 95\%$  of data points within LOA are suggested to show adequate absolute reliability for the shorter sample length compared to the 20-min reference sample.

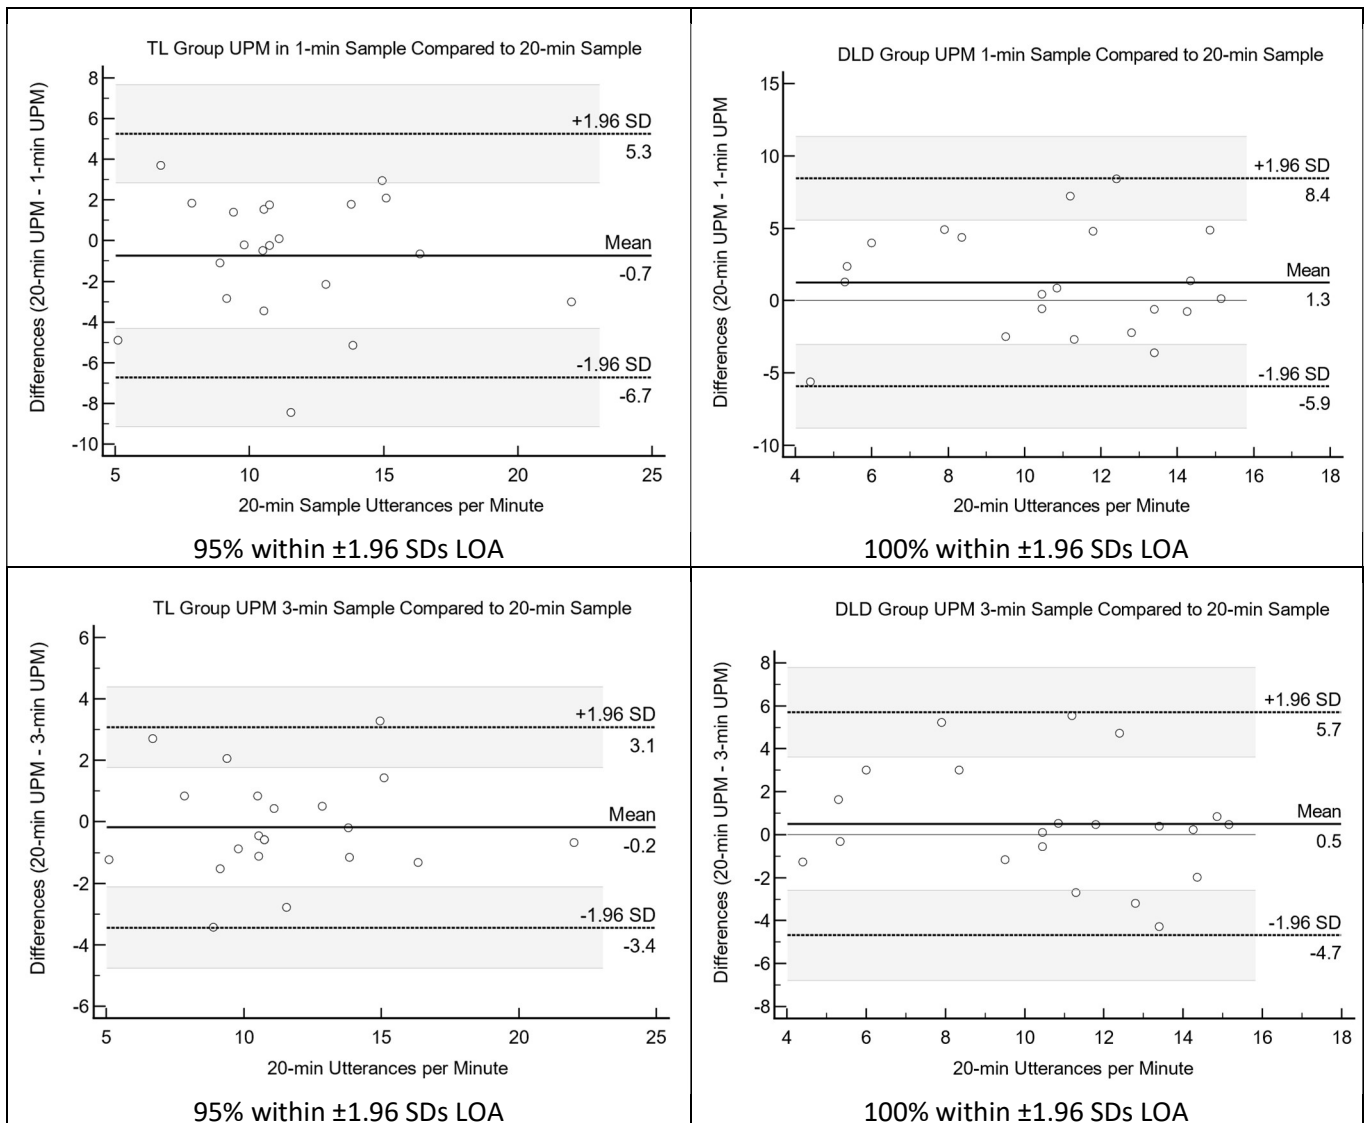

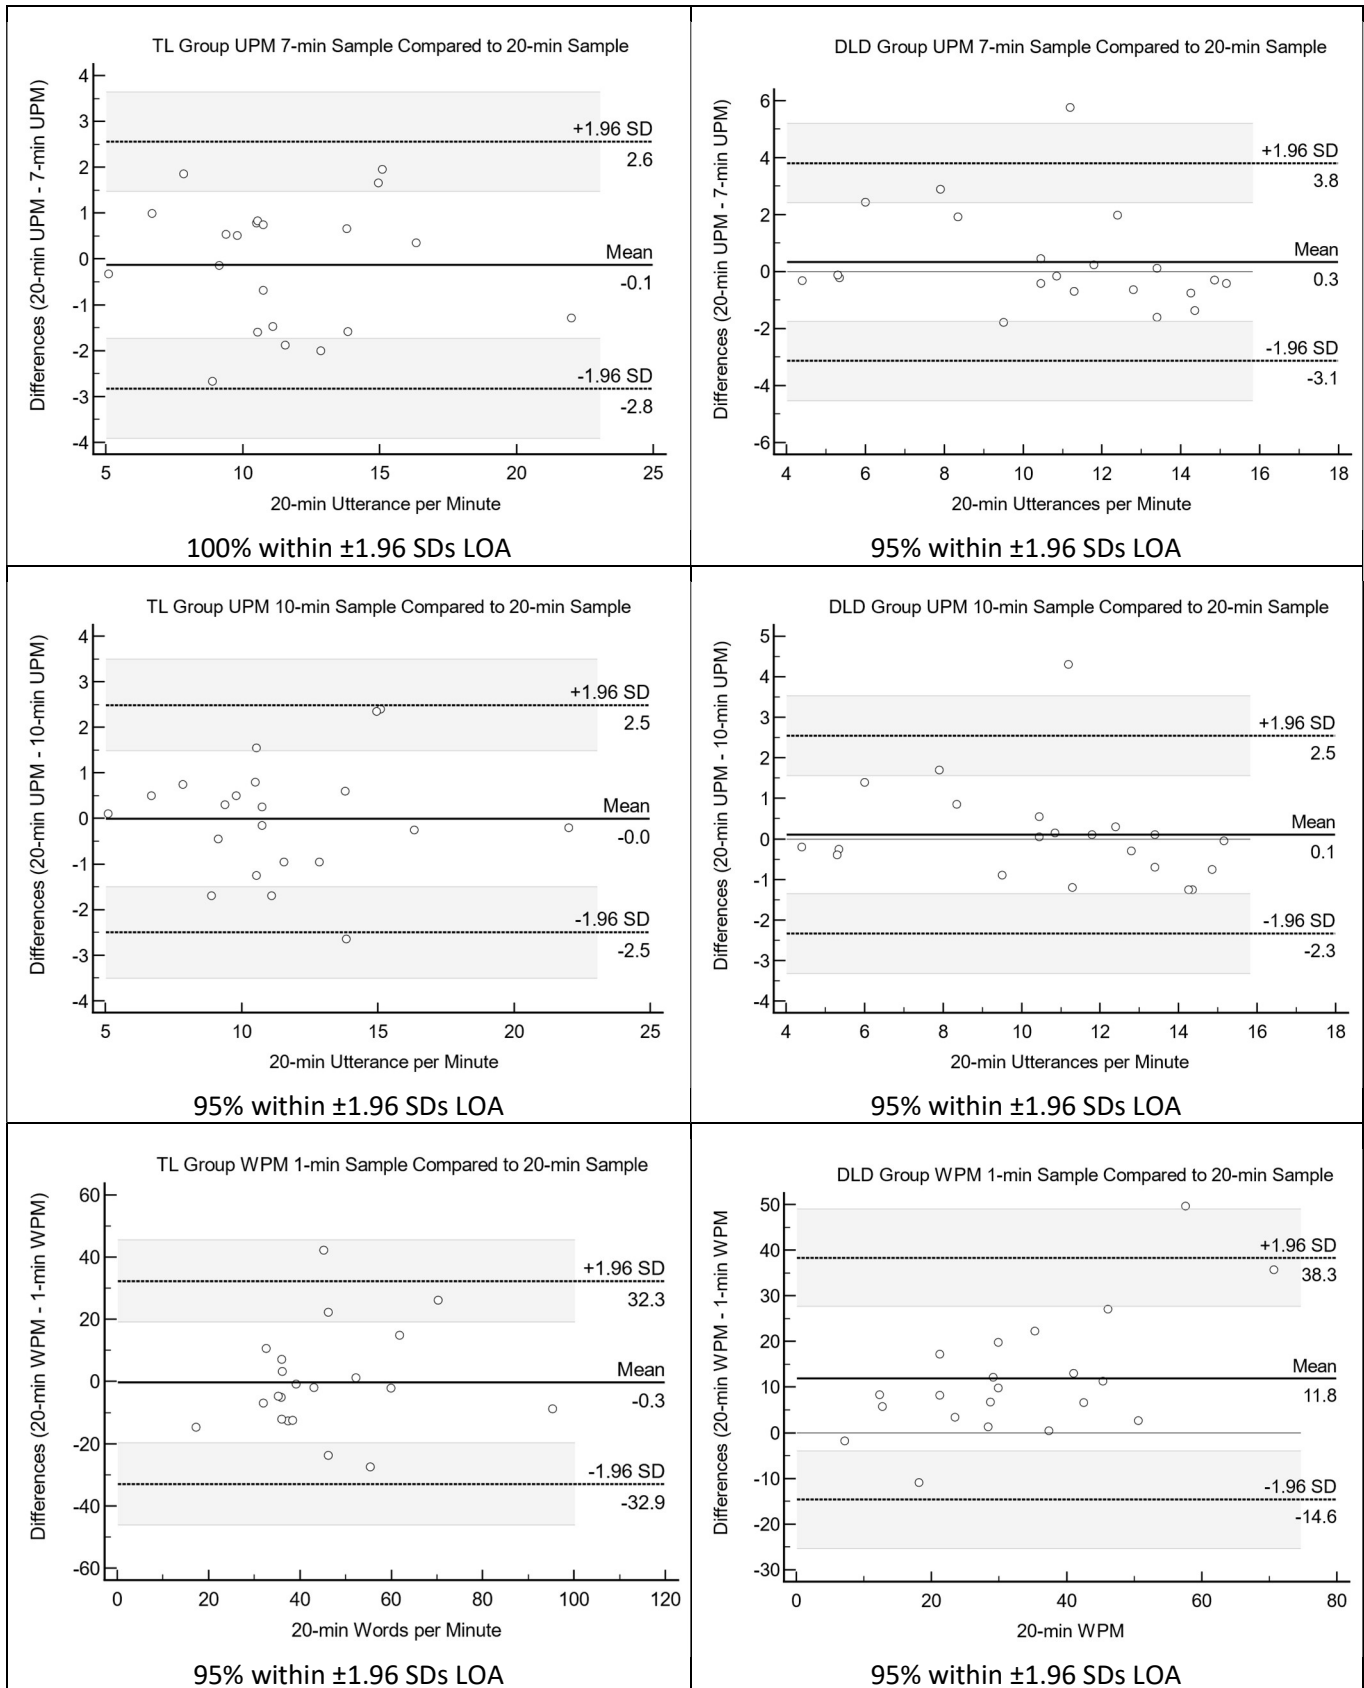

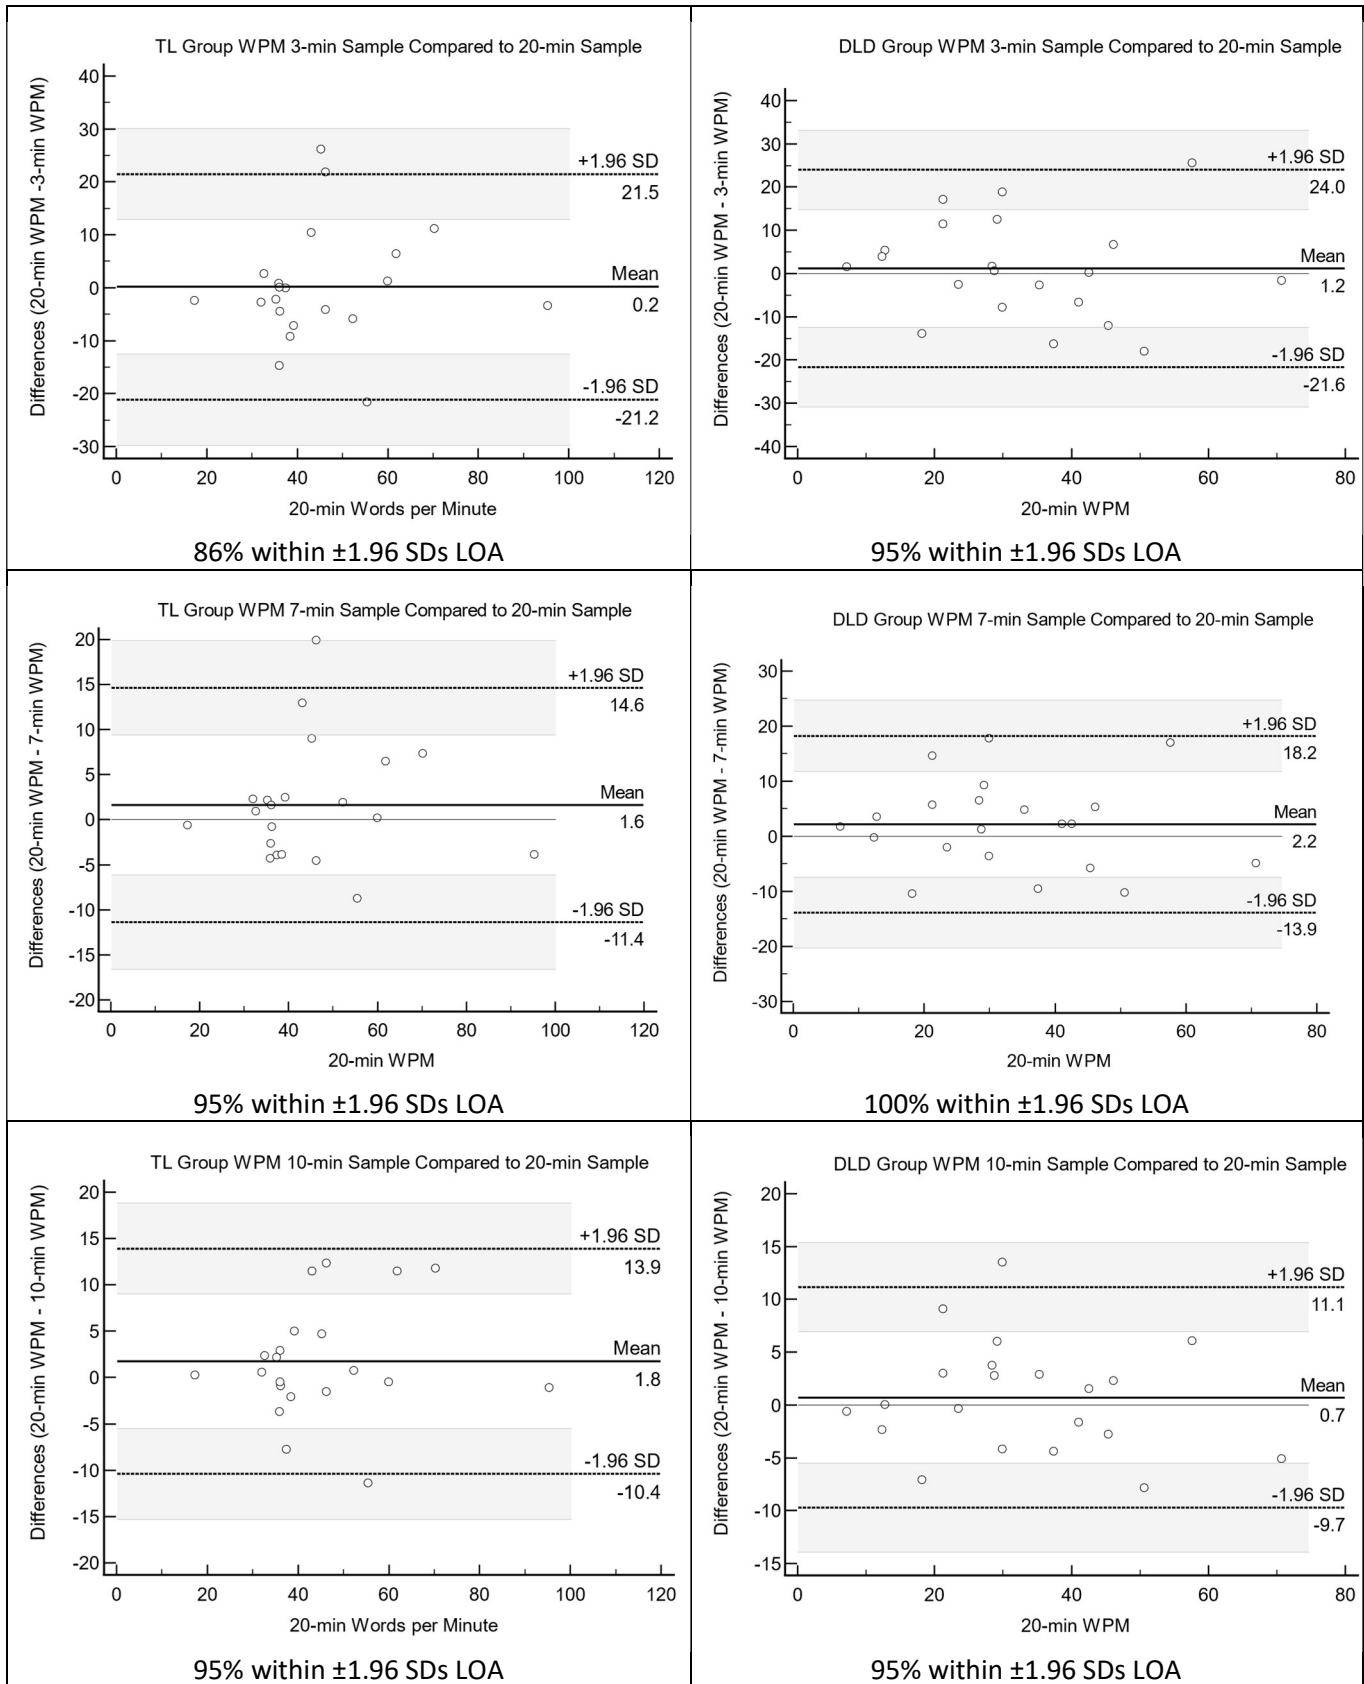

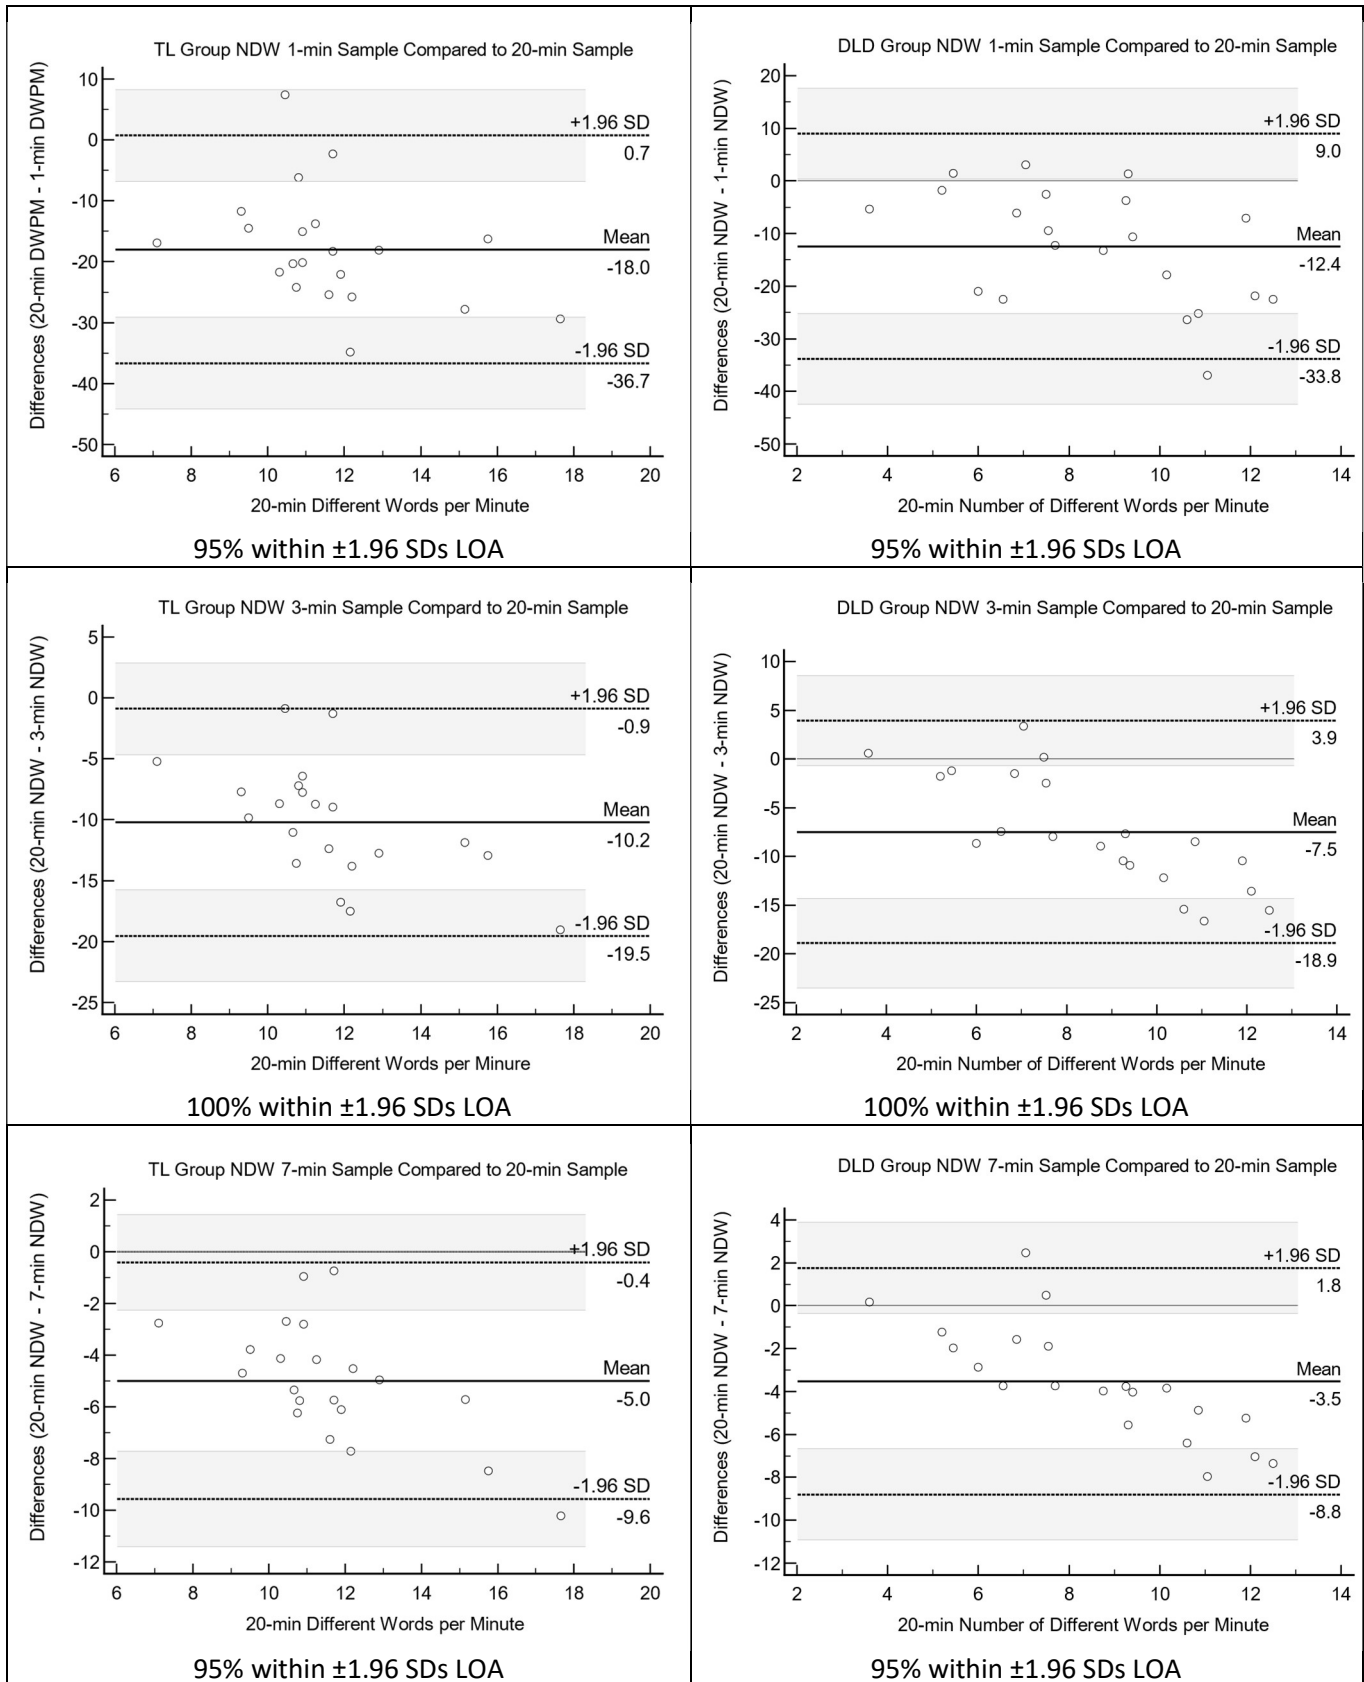

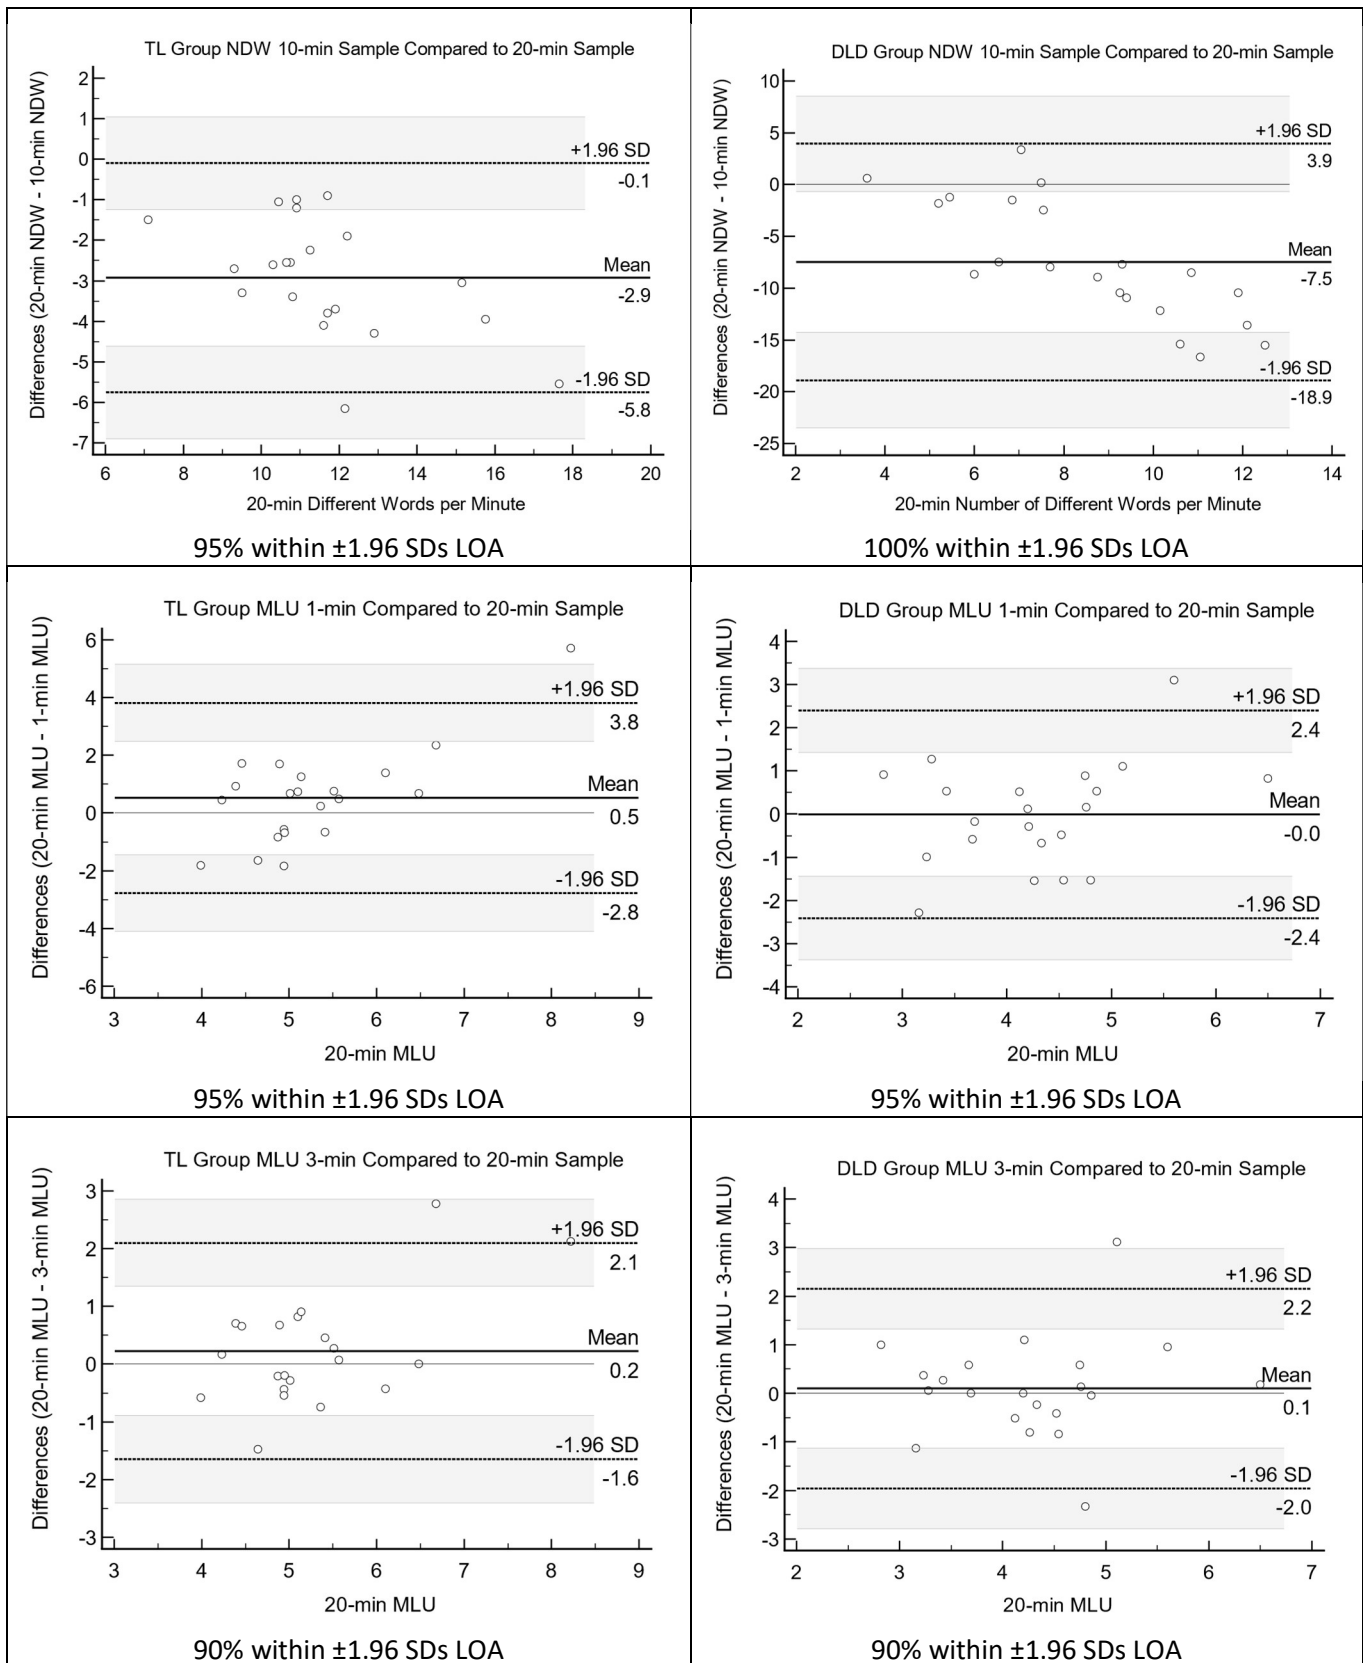

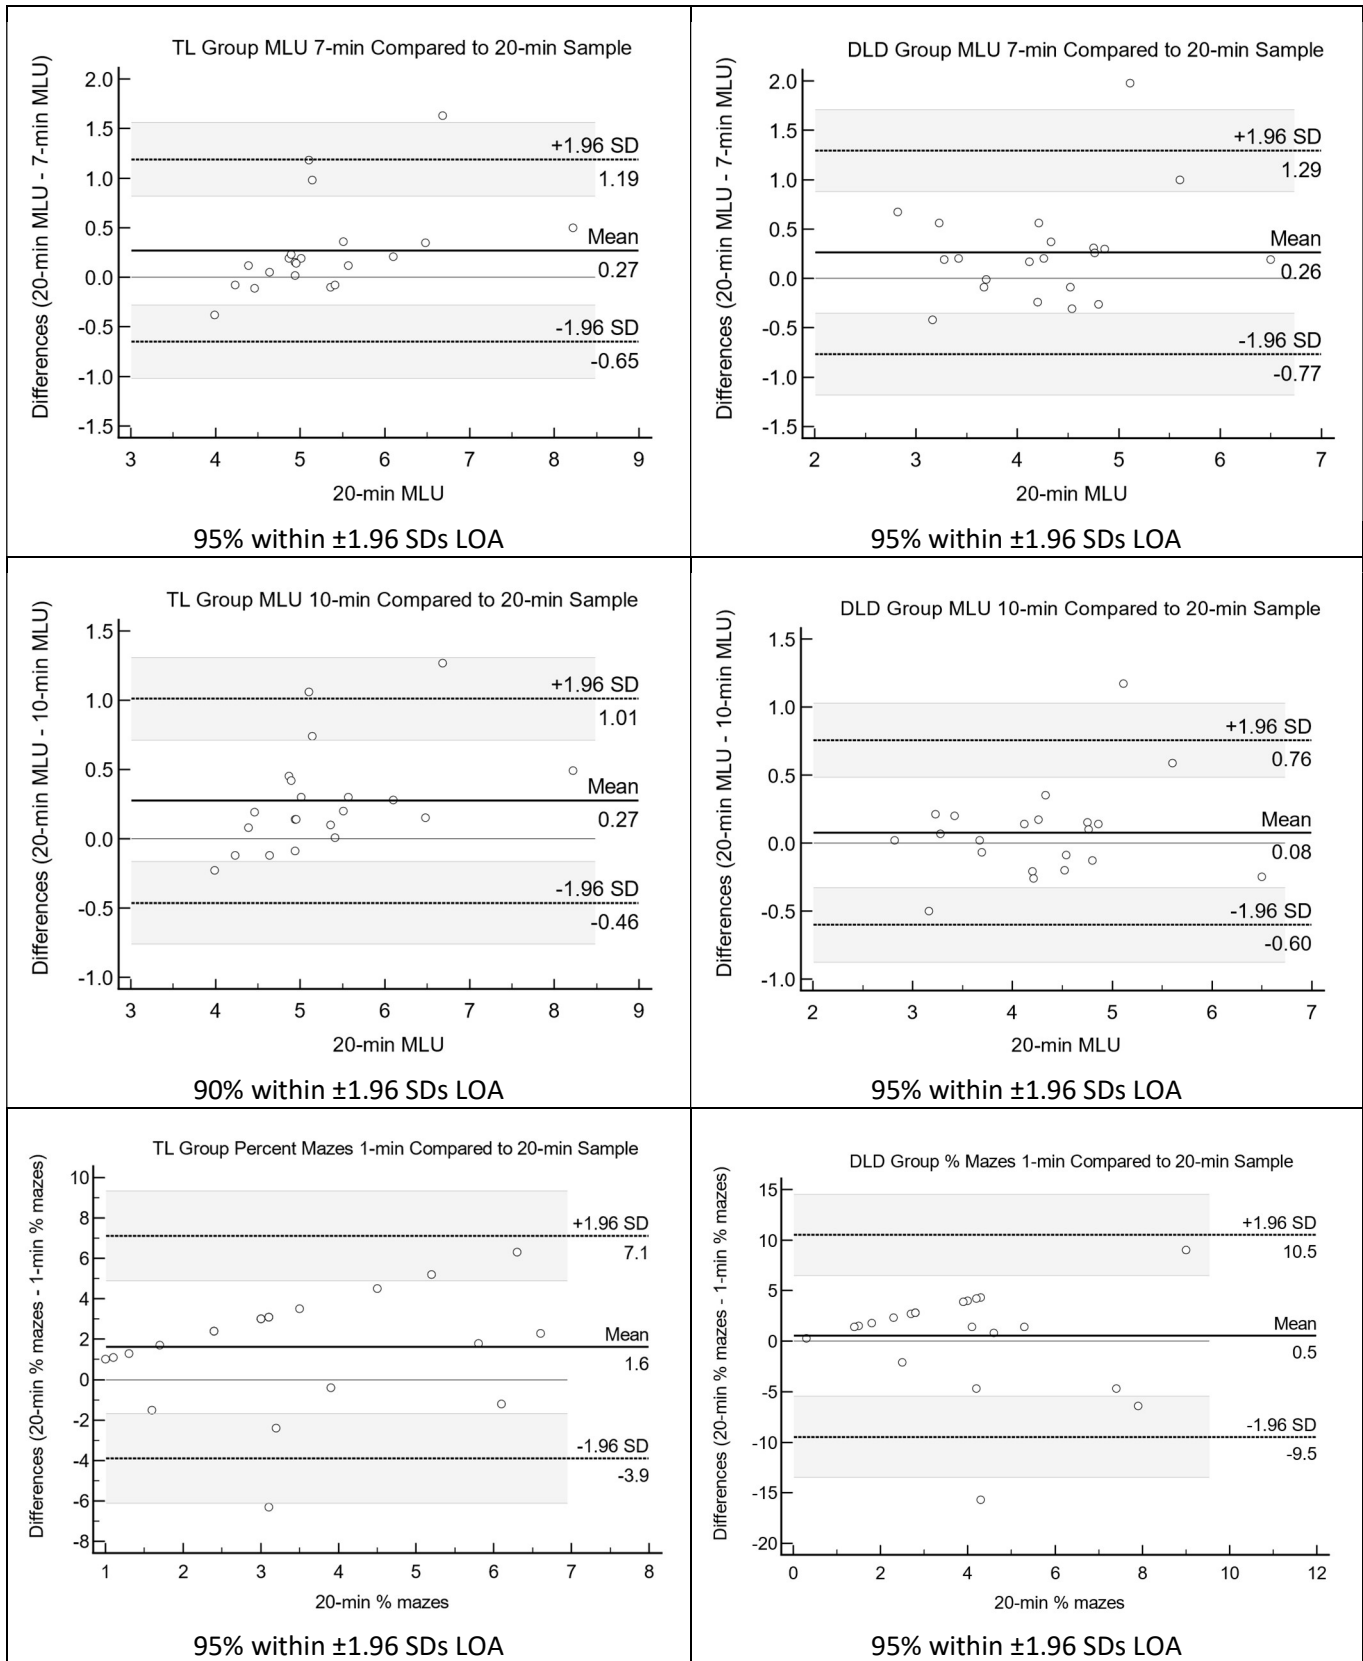

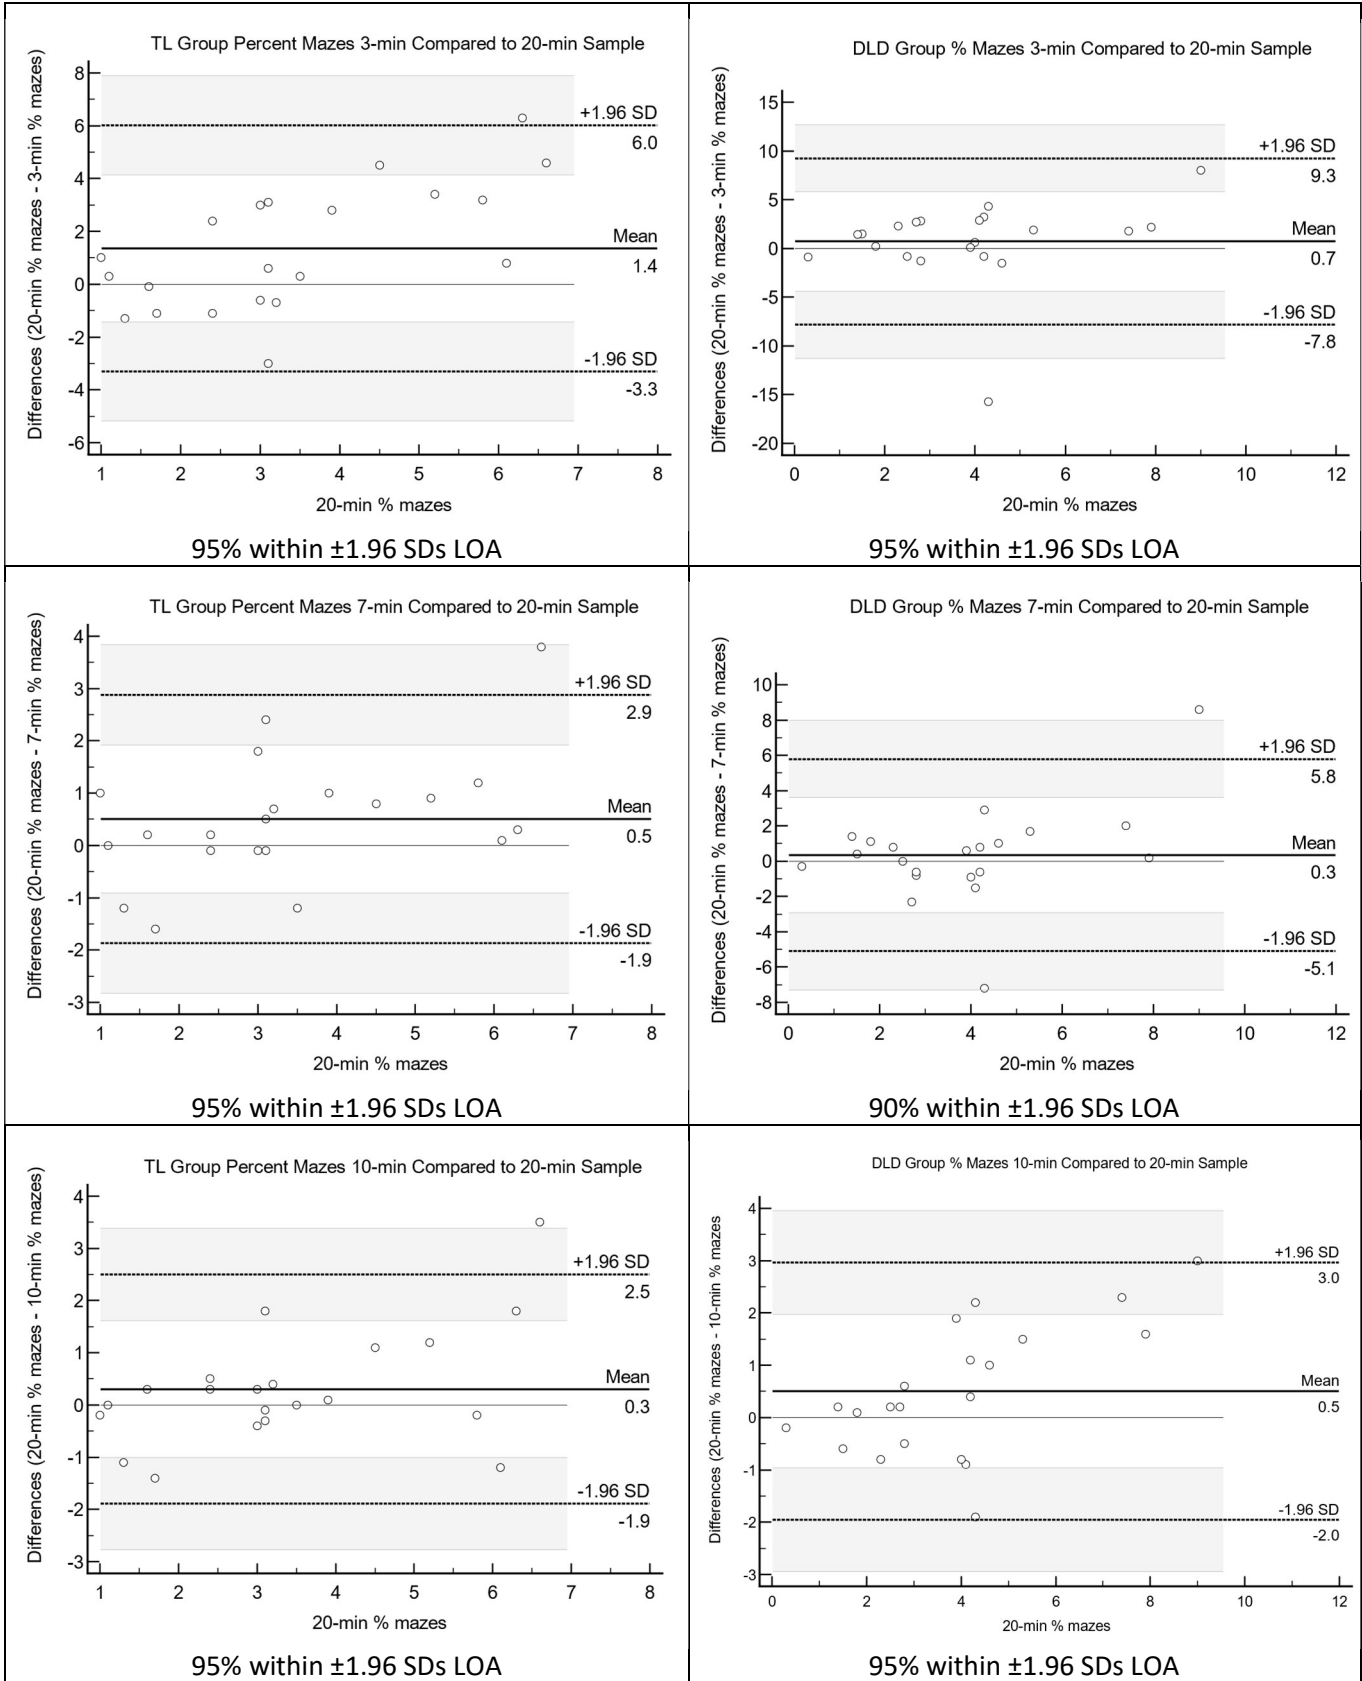

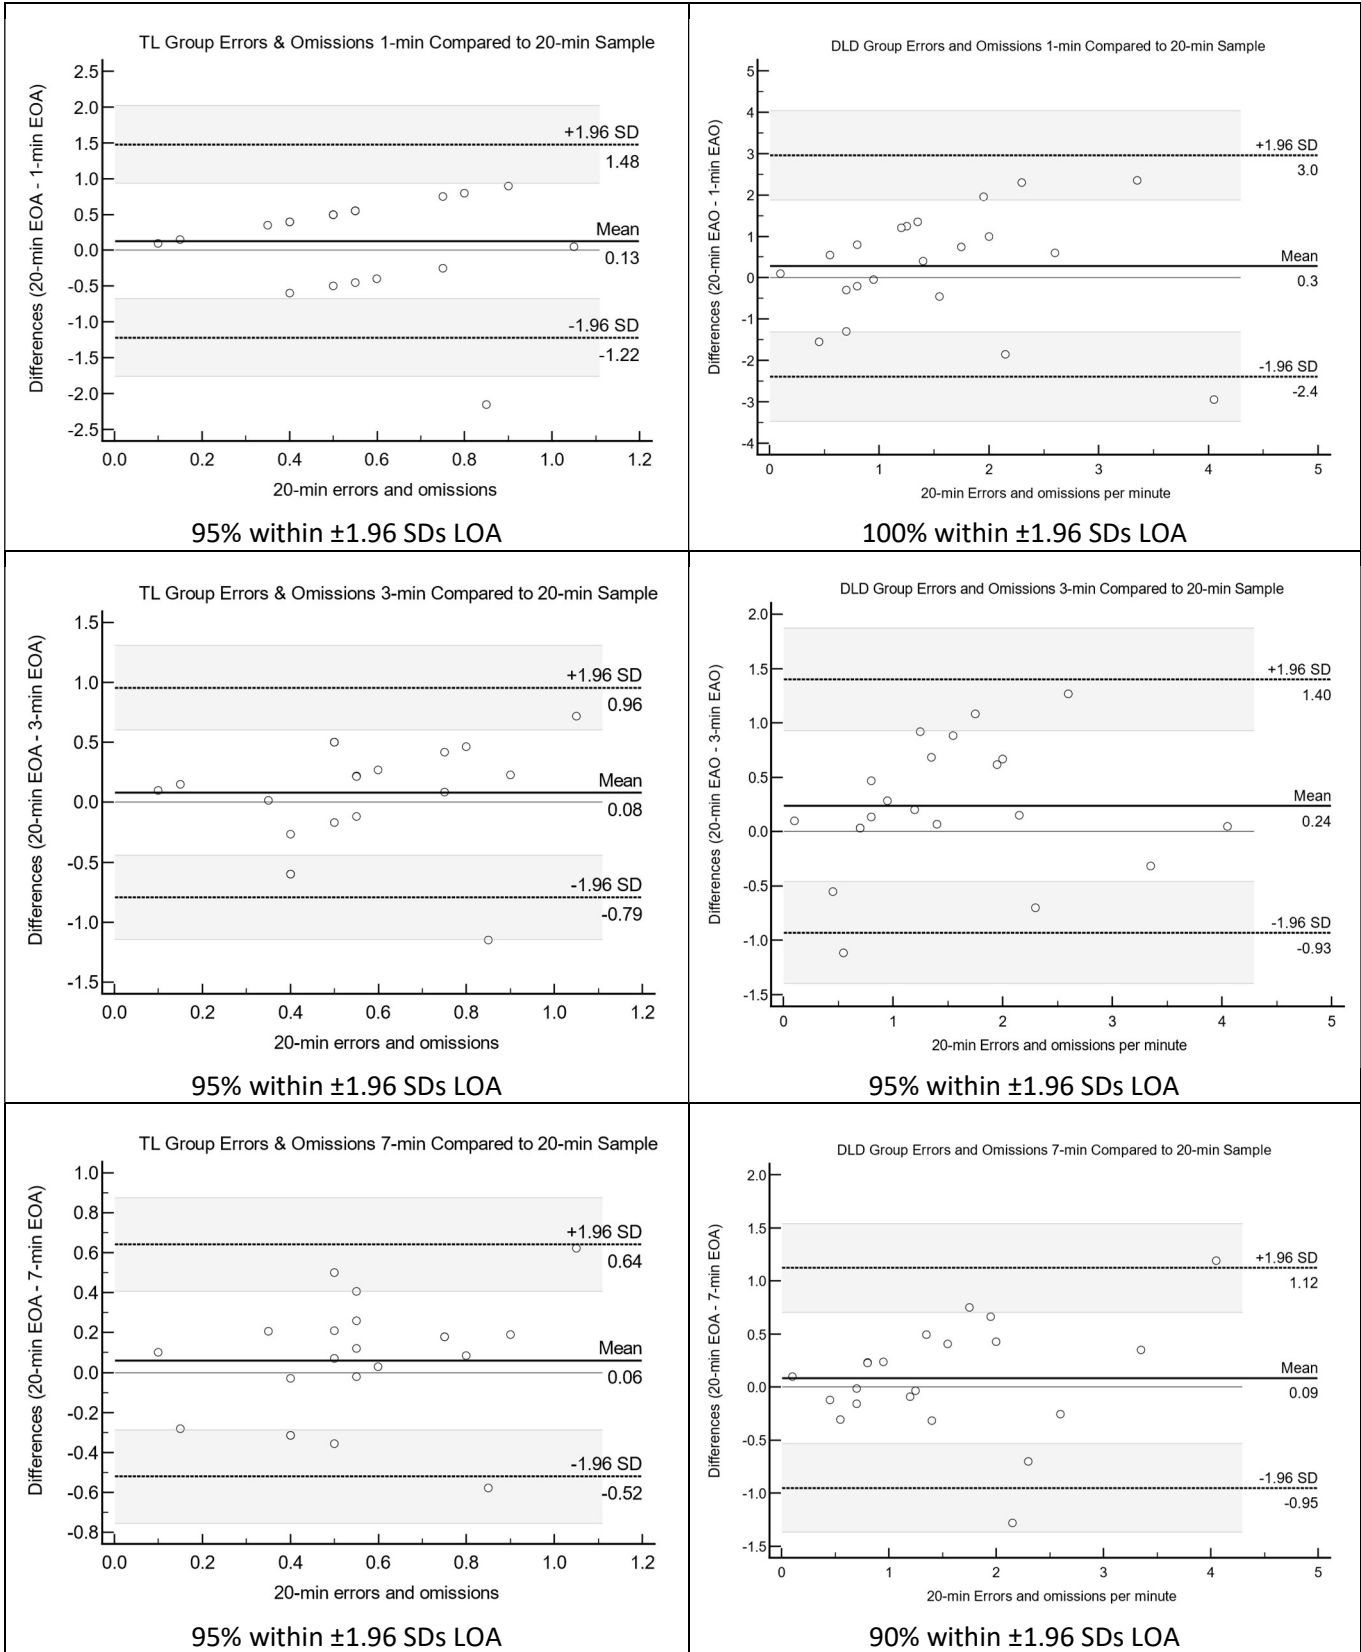



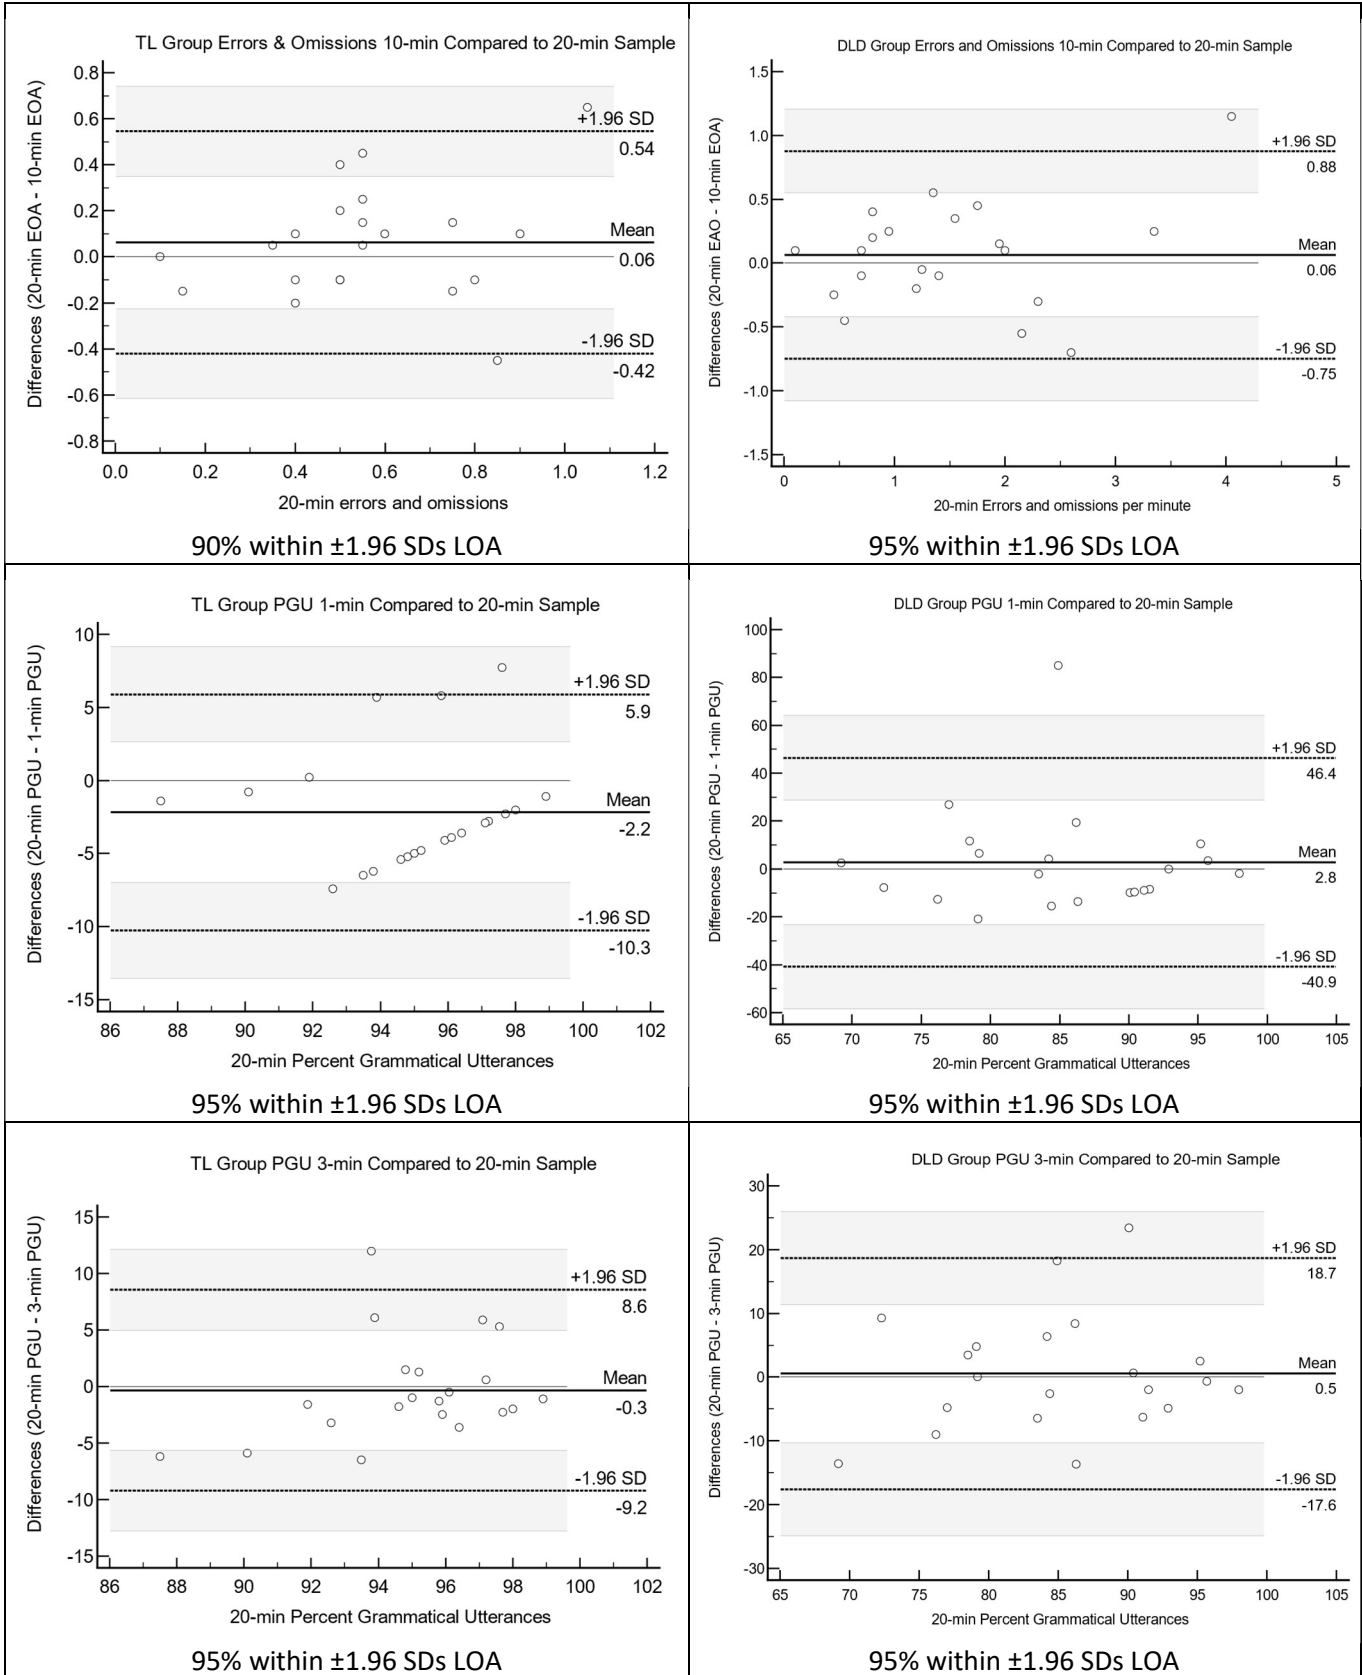

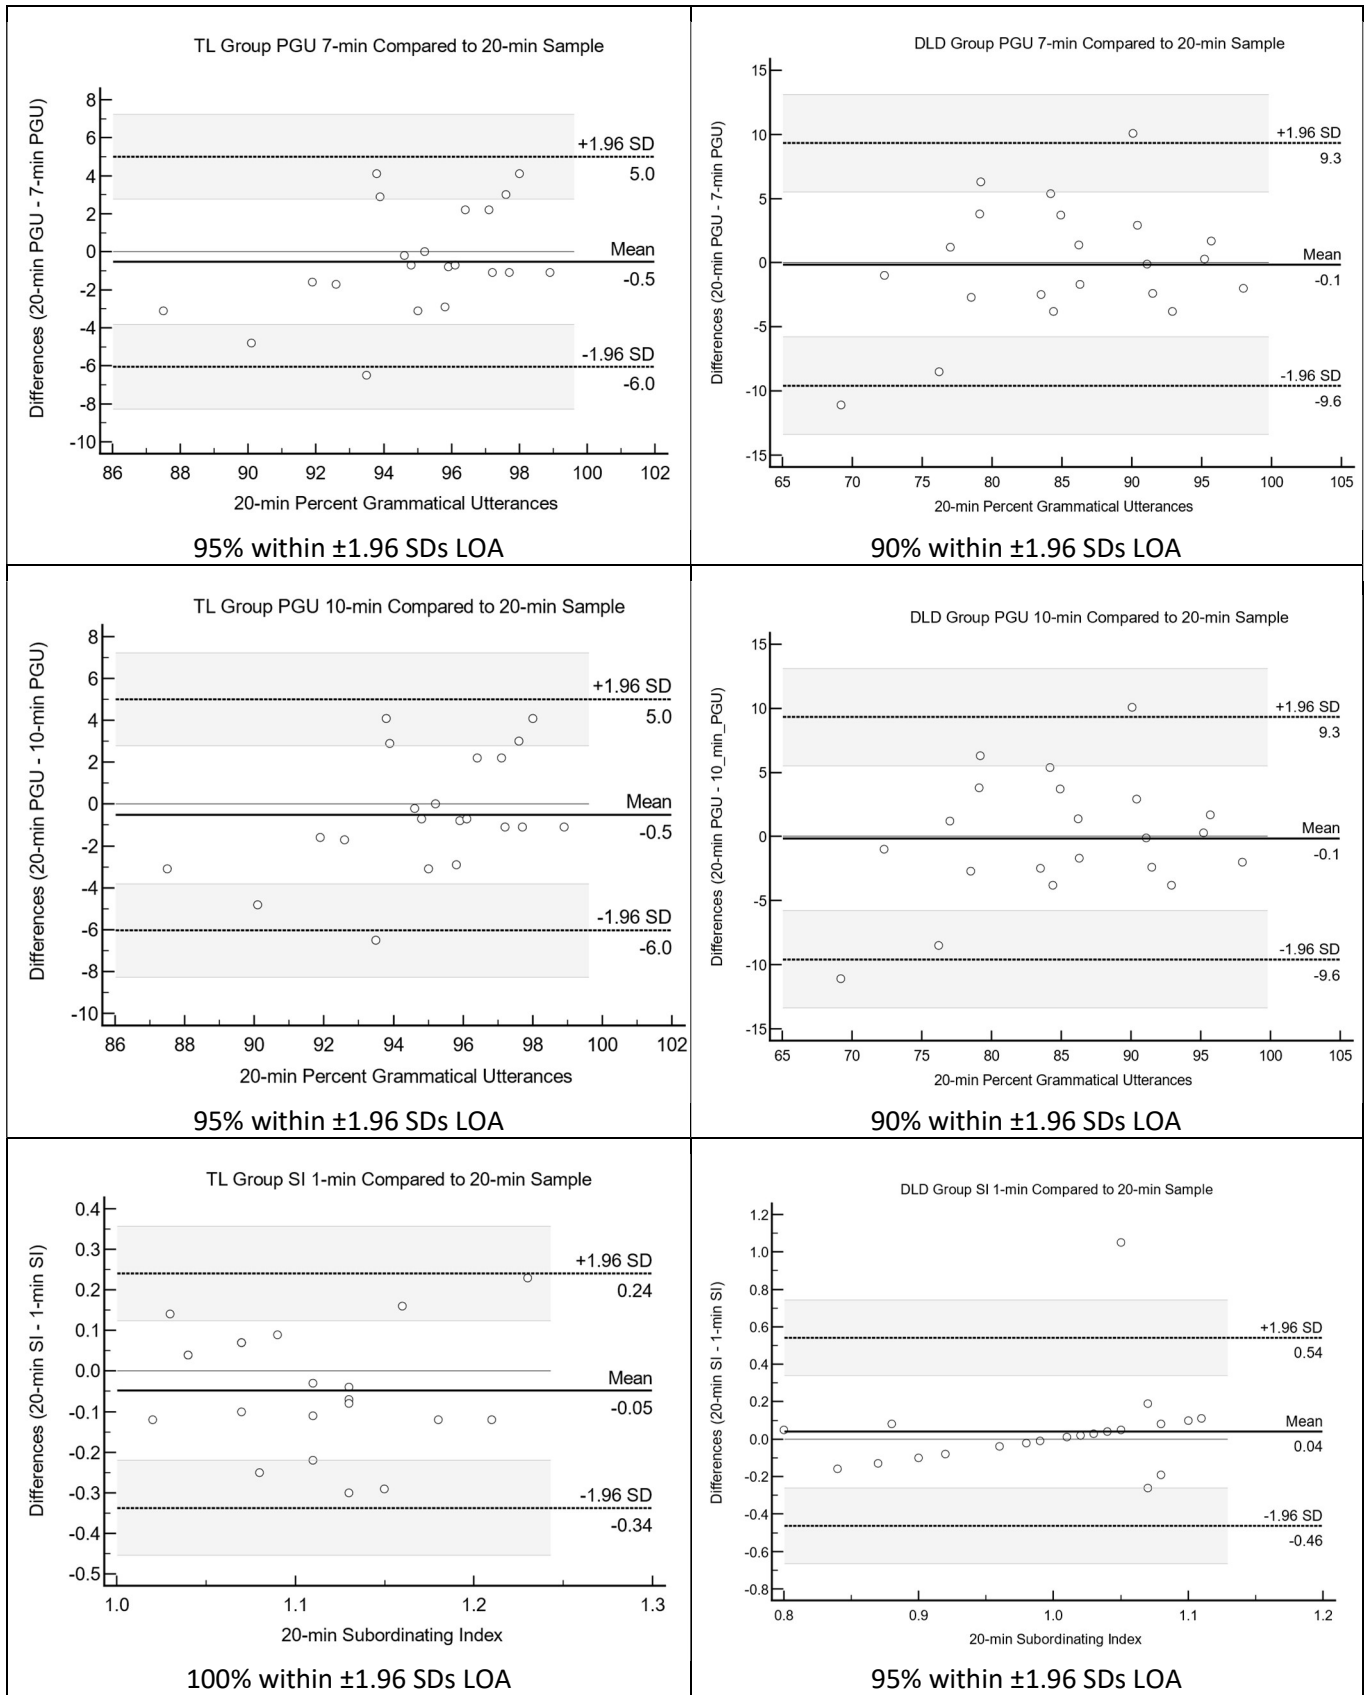

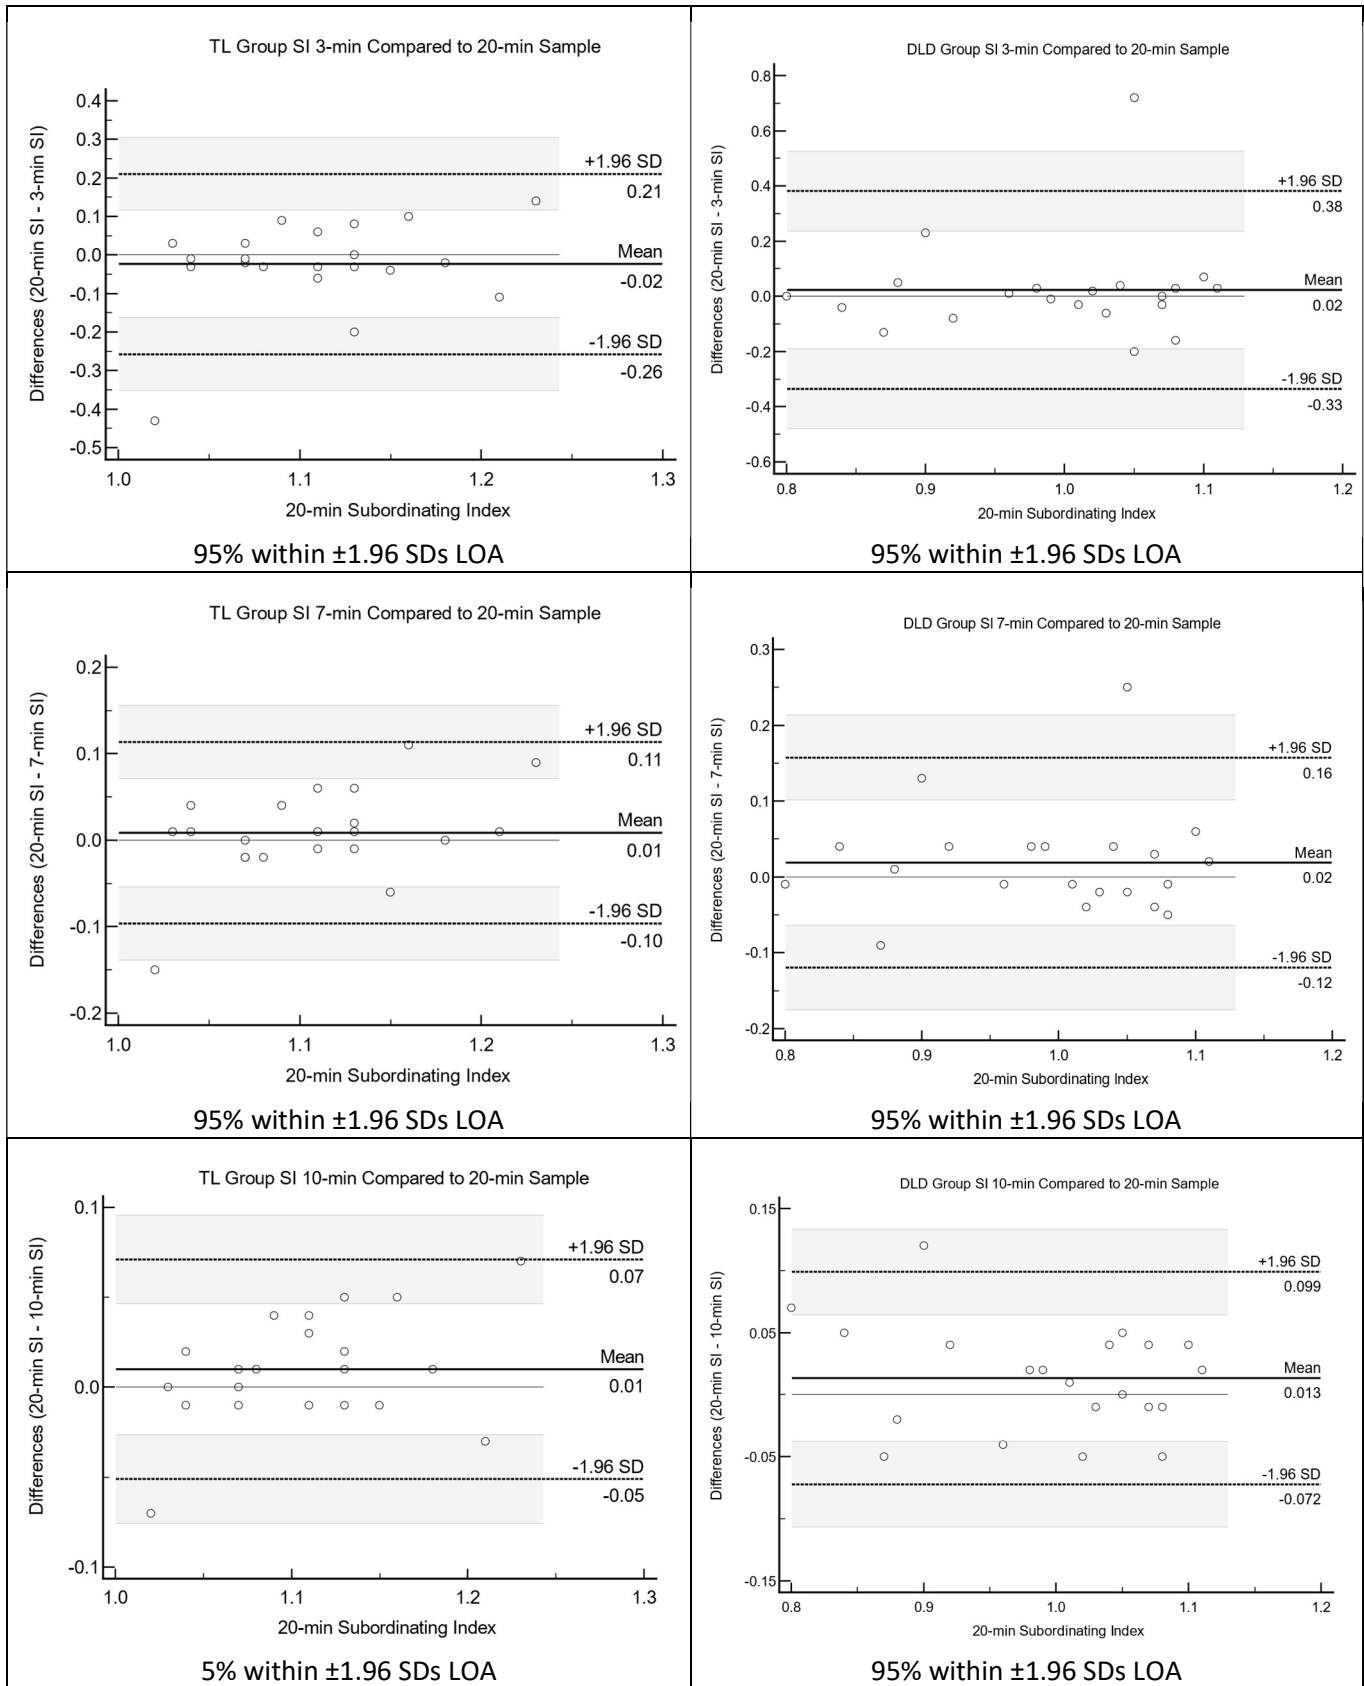

Supplement: JSLHR-65-1939-s004.pdf [file JSLHR-65-1939-s004.pdf]
