# Supplementary material
Source: PubMed Central journal article supplement (PMC9559652)

**Supplemental Material S6.** Bland-Altman plots for MLU comparing 1, 3, 7, and 10-min sample lengths to 20-min sample length by group (TL, DLD) with limits of agreement (LOA) based on  $\pm 0.5$  MLU (dashed horizontal lines). These figures show differences in scores between sample lengths on the y-axis and scores from 20-min samples on the x-axis. Solid black horizontal line = mean differences between sample measures. The distance between the horizontal mean difference line and zero shows measurement bias. Plots with  $\geq 95\%$  of data points within LOA are suggested to show adequate absolute reliability for the shorter sample length compared to the 20-min reference sample.

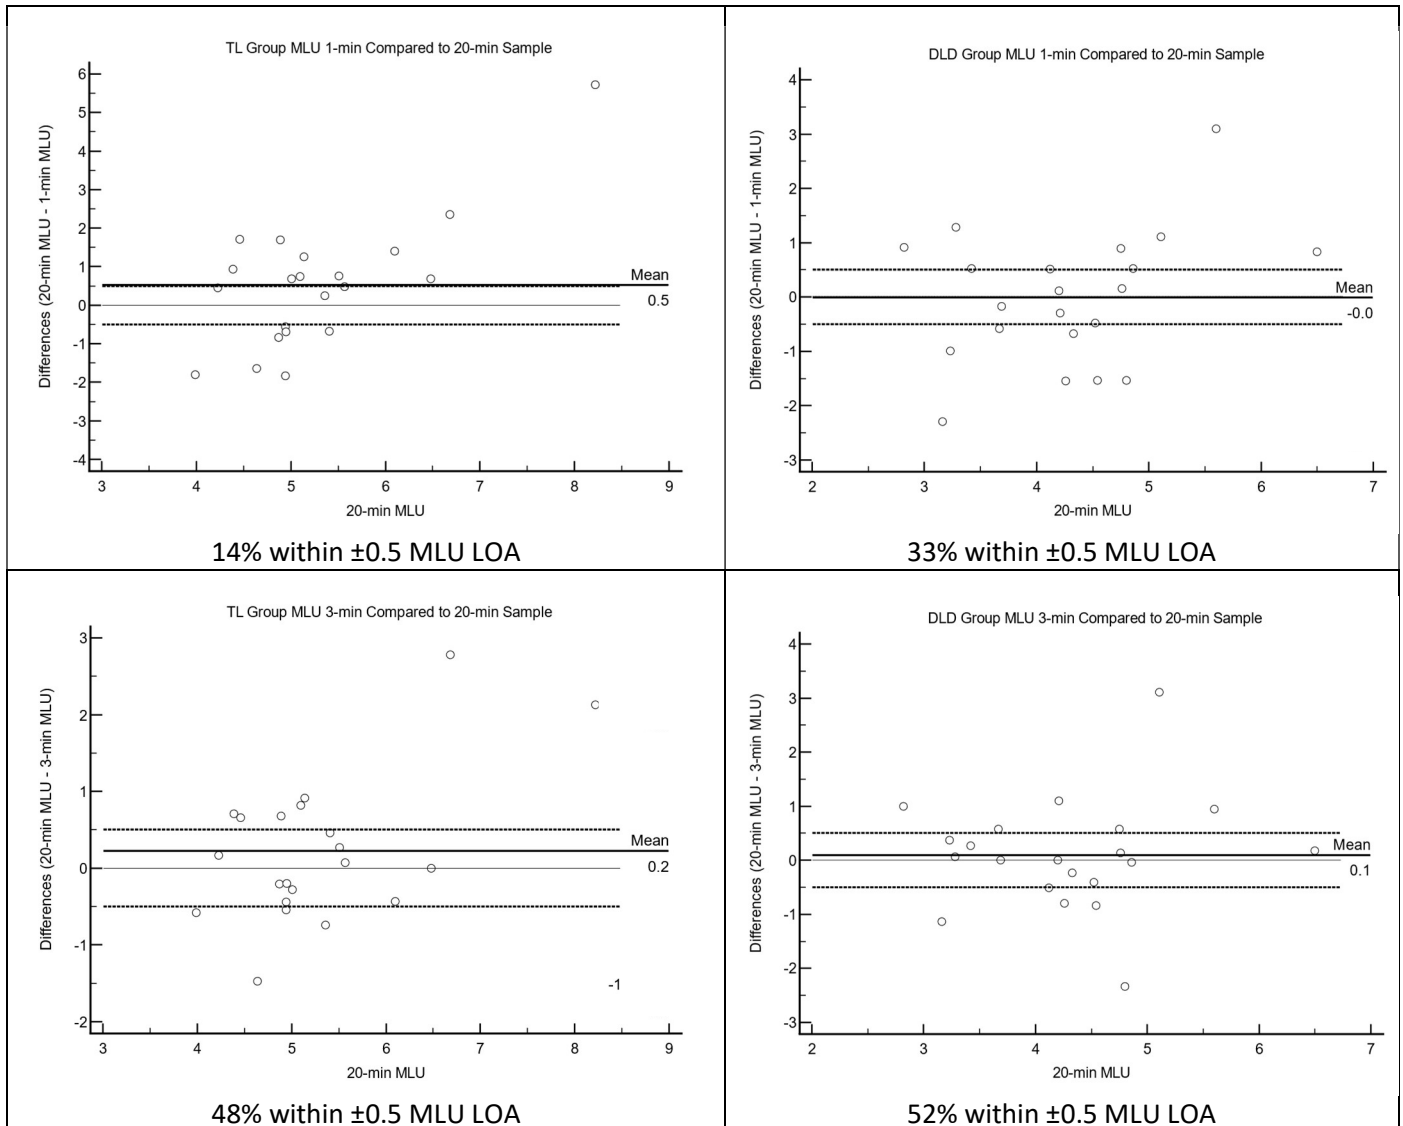

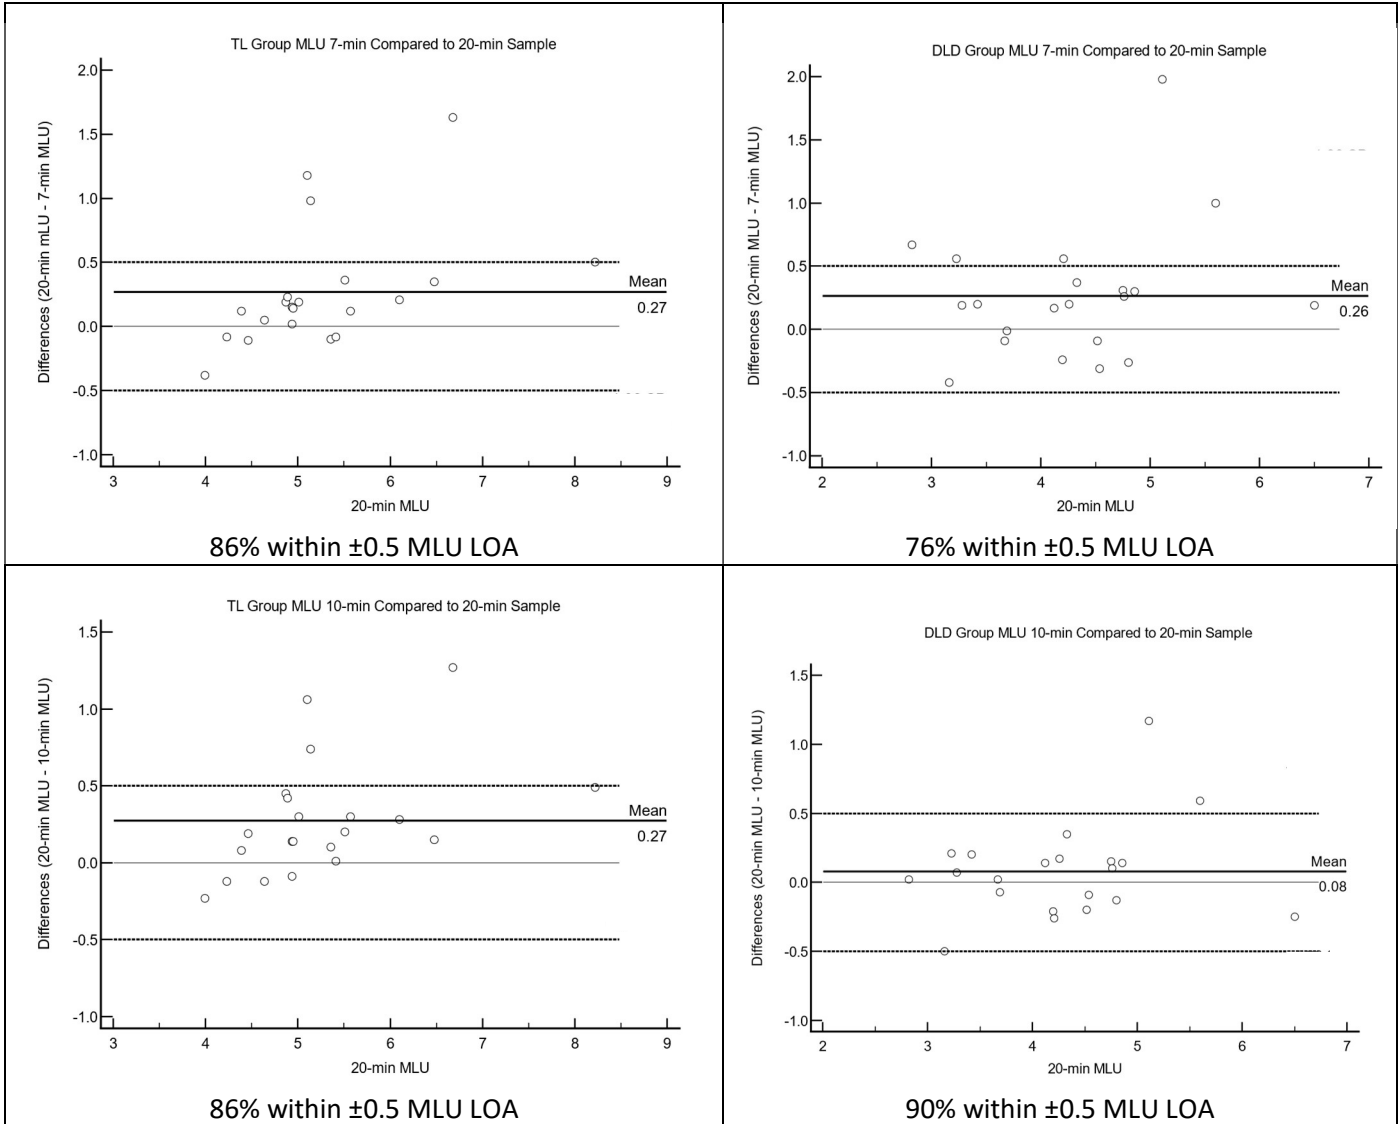

Supplement: JSLHR-65-1939-s006.pdf [file JSLHR-65-1939-s006.pdf]
