# Supplementary material
Source: PubMed Central journal article supplement (PMC9559652)
Supplement: JSLHR-65-1939-s007.pdf [file JSLHR-65-1939-s007.pdf]

**Supplemental Material S7.** Split-half reliability between the first 10 and last 10 minutes of 20-minute language samples calculated with Spearman-Brown coefficients, by group (TL = typical language; DLD = developmental language disorder).

|                                | <b>TL Group</b> | <b>DLD Group</b> |
|--------------------------------|-----------------|------------------|
| Total Utterances               | .88             | .87              |
| Total Words                    | .86             | .90              |
| Number of Different Words      | .91             | .92              |
| MLU                            | .87             | .88              |
| Percent Maze Words             | .66             | .47              |
| Errors and Omissions           | -.17            | .83              |
| Subordinating Index            | .76             | .77              |
| Percent Grammatical Utterances | .45             | .79              |
